# Supplementary material for: The Impact of Praise on Cooperative Behavior in Three-Player Public Goods Games and Its Gender Differences
Source: MDPI journal article supplement (doi:10.3390/bs14040264), 2024-03-22
Supplement: s1 [file s1]

# Experimental Flows Page by Page for Praise and Cooperation Study—praisePaper2

March 22, 2024

## Contents

|          |                                |           |
|----------|--------------------------------|-----------|
| <b>1</b> | <b>Public Praise Condition</b> | <b>2</b>  |
| <b>2</b> | <b>No Praise Condition</b>     | <b>14</b> |

# 1 Public Praise Condition

Page 1 Welcome Page

欢迎参加我们心理学实验!

点击此处, 进入下一步

Welcome to attend our psychological experiment.

Click here to Next Page.

### 研究内容告知书

本研究是关于个体如何进行决策。通过这些研究，帮助个体、社会更好地了解决策的过程。在实验过程中，您若有任何问题，可与我们联系。

[Redacted text]

下一页

### Study Information Notice

This study is about how to make decision. Through these studies, we are able to help individuals, society to understanding the process of decision making. During the progress of experiment, if you have any questions, please feel free to contact me.

Contact Information of Researchers. [cover for privacy issue. ]

### Page 3 Personal Information Collection

请输入以下你的相关信息：

姓名首字母 (小写)

年龄 [18岁-100岁之间, 包含18岁和100岁]

性别

☐ 男 ☐ 女

个人信息填写完整并准确, 点击此处, 进入下一步

Your initial name (lower cases)

age: (18 to 100 years old)

gender: male; female

Click here to the next page.

## 实验指导语

亲爱的同学们，欢迎参加本次实验。  
正式实验之前电脑将你们随机分成2组，每组3个人。  
请您仔细阅读电脑屏幕上的文字，并按照相应的要求进行操作。  
如有问题请举手，会有主试帮您解答。

实验指导语已学习完，进入下一步

### Experimental Instruction:

Welcome to our experiment. Before we start our experiment, you will be randomly into 2 groups, and each group will be assigned with three players. Please read carefully with the word in the screen, and operate according to the instruction. If you have any question, we will answer your question as detailed as we can.

### 游戏规则

本次任务将进行多轮投资，每位组员有自己的个人账户，并且每一轮都会给每位小组成员 100 个代币。  
每个小组有一个公共账户，每位组员可以按照自己的意愿，将一定数目(0~100)的代币投入到公共账户当中。  
投入到公共账户的代币数将会 $\times 2$ ，然后再平均分配到每位组员的个人账户中。  
因此，您的个人账户数额 = (剩余资产 + 您三人的投资总和 $\times 2/3$ )

规则已了解，进入下一步

This task will involve multiple rounds of investment, with each team member having their own personal account, and each round, every team member will receive 100 tokens. Each group has a public account, and each member can invest a certain number  $X_i$  of tokens into the public account as they wish. ( $0 \leq X_i \leq 100$ ) The tokens invested in the public account will be doubled and then evenly distributed to each team member's personal account. The final amount in each person's personal account is:  $(100 - X_i) + (X_i + Y) \times 2/3$ .  
I have understood the instruction, click here to next move.

## Page 6 Rule Comprehension Task

### 规则检验

为确保您已熟悉游戏规则，请您认真回答以下问题：

1、如果您投资了5枚代币，其他两人投资的数目分别是55枚、60枚，那么您将从公共账户得到多少代币？

- ☐ A、175
- ☐ B、110
- ☐ C、120

2、如果您投资了20枚代币，其他两人投资的数目分别是55枚、60枚，那么您将从公共账户得到多少代币？

- ☐ A、175
- ☐ B、170
- ☐ C、160

3、如果您投资了44枚代币，其他两人投资的数目分别是55枚、60枚，那么您将从公共账户得到多少代币？

- ☐ A、172
- ☐ B、132
- ☐ C、162

已回答，点击此处，进入下一步

### Rule Comprehension Task:

To ensure you have understood instruction of the game, please answer the questions carefully. "1. If you invest 5 tokens, and the other two people invest 55 and 60 tokens respectively, how many tokens will you receive from the public account?

A: 175; B: 110; C: 120;

2. If you invest 20 tokens, and the other two people invest 55 and 60 tokens respectively, how many tokens will you receive from the public account?

A: 175; B: 170; C: 160;

3. If you invest 44 tokens, and the other two people invest 55 and 60 tokens respectively, how many tokens will you receive from the public account?"

A: 172; B: 132; C: 162;

I have answered these questions, click here to next step.

|                                                                                                        |                                                                                                        |                                                                                                        |
|--------------------------------------------------------------------------------------------------------|--------------------------------------------------------------------------------------------------------|--------------------------------------------------------------------------------------------------------|
| <p>您的角色</p> <p>您是 1号。</p> <p>角色已知晓, 进入下一步</p>                                                          | <p>您的角色</p> <p>您是 2号。</p> <p>角色已知晓, 进入下一步</p>                                                          | <p>您的角色</p> <p>您是 3号。</p> <p>角色已知晓, 进入下一步</p>                                                          |
| <p>Your role:</p> <p>You are Player 1.</p> <p>I have understood the role, click here to next page.</p> | <p>Your role:</p> <p>You are Player 2.</p> <p>I have understood the role, click here to next page.</p> | <p>Your role:</p> <p>You are Player 3.</p> <p>I have understood the role, click here to next page.</p> |



## 您的决定

请决定本轮您将从100.00 元现金券 中向公共账户投资多少钱。

你愿意投资多少钱？

 元现金券

已做好决定，进入下一步

Please decide how many tokens you will decide to contribute from 100 in to public account.

How many tokens you are willing to invest

Click here to next page.

Page 9 waiting page

请等待

请等待其他参与者。

Waiting for Other participants to decide.

### 投资结果

本轮投资已结束，这些金额已全部存入你们的公共账户。

鉴于1号玩家是三人中为公共账户中投资金额最多的人，我们认为1号玩家显然更加重视集体利益，更加具有社会所需要的奉献和合作精神。

为开展新项目，现仍需您为所在小组做出第二轮投资。 [阅读完毕，进入下一轮](#)

### Investigation Outcome

This round of investment has ended, and these amounts have been fully deposited into your public account.

From this round of investment, it can be seen that Player 1 is a person who values collective interest and has a spirit of dedication. For start a new project, now you need to investigate in a second round.

[Click here to next page.](#)

## 您的决定

本轮中您仍将拥有100.00 元现金券代币作为初始资产 请决定本轮您将向公共账户投资多少钱。

你愿意投资多少钱？

 元现金券

已做好决定，进入下一步

Please decide how many tokens you will decide to contribute from 100 in to public account.

How many tokens you are willing to invest

Click here to next page.

# 感谢您的参与!

如果针对此研究有任何问题, 欢迎与 [redacted] 取得联系。

Thank you for your attention.

## 2 No Praise Condition

Page 1 Welcome Page

欢迎参加我们心理学实验!

点击此处, 进入下一步

Welcome to attend our psychological experiment.

Click here to Next Page.

### 研究内容告知书

本研究是关于个体如何进行决策。通过这些研究，帮助个体、社会更好地了解决策的过程。在实验过程中，您若有任何问题，可与我们取得联系。

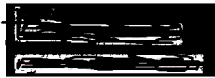

下一页

### Study Information Notice

This study is about how to make decision. Through these studies, we are able to help individuals, society to understanding the process of decision making. During the progress of experiment, if you have any questions, please feel free to contact me.

Contact Information of Researchers. [cover for privacy issue. ]

### Page 3 Personal Information Collection

请输入以下你的相关信息：

姓名首字母 (小写)

年龄 [18岁-100岁之间, 包含18岁和100岁]

性别

☐ 男 ☐ 女

个人信息填写完整并准确, 点击此处, 进入下一步

Your initial name (lower cases)

age: (18 to 100 years old)

gender: male; female

Click here to the next page.



## 实验指导语

亲爱的同学们，欢迎参加本次实验。

正式实验之前电脑将您们随机分成2组，每组3个人。

请您仔细阅读电脑屏幕上的文字，并按照相应的要求进行操作。

如有问题请举手，会有主试帮您解答。

实验指导语已学习完，进入下一步

### Experimental Instruction:

Welcome to our experiment. Before we start our experiment, you will be randomly into 2 groups, and each group will be assigned with three players. Please read carefully with the word in the screen, and operate according to the instruction. If you have any question, we will answer your question as detailed as we can.

### 游戏规则

本次任务将进行多轮投资，每位组员有自己的个人账户，并且每一轮都会给每位小组成员 100 个代币。  
每个小组有一个公共账户，每位组员可以按照自己的意愿，将一定数目(0~100)的代币投入到公共账户当中。  
投入到公共账户的代币数将会 $\times 2$ ，然后再平均分配到每位组员的个人账户中。  
因此，您的个人账户数额 = (剩余资产 + 您三人的投资总和 $\times 2/3$ )

规则已了解，进入下一步

This task will involve multiple rounds of investment, with each team member having their own personal account, and each round, every team member will receive 100 tokens. Each group has a public account, and each member can invest a certain number  $X_i$  of tokens into the public account as they wish. ( $0 \leq X_i \leq 100$ ) The tokens invested in the public account will be doubled and then evenly distributed to each team member's personal account. The final amount in each person's personal account is:  $(100 - X_i) + (X_i + Y) \times 2/3$ .  
I have understood the instruction, click here to next move.

## Page 6 Rule Comprehension Task

### 规则检验

为确保您已熟悉游戏规则，请您认真回答以下问题：

1、如果您投资了5枚代币，其他两人投资的数目分别是55枚、60枚，那么您将从公共账户口得到多少代币？

- ☐ A、175  
☐ B、110  
☐ C、120

2、如果您投资了20枚代币，其他两人投资的数目分别是55枚、60枚，那么您将从公共账户口得到多少代币？

- ☐ A、175  
☐ B、170  
☐ C、160

3、如果您投资了44枚代币，其他两人投资的数目分别是55枚、60枚，那么您将从公共账户口得到多少代币？

- ☐ A、172  
☐ B、132  
☐ C、162

已回答，点击此处，进入下一步

### Rule Comprehension Task:

To ensure you have understood instruction of the game, please answer the questions carefully. "1. If you invest 5 tokens, and the other two people invest 55 and 60 tokens respectively, how many tokens will you receive from the public account?

A: 175; B: 110; C: 120;

2. If you invest 20 tokens, and the other two people invest 55 and 60 tokens respectively, how many tokens will you receive from the public account?

A: 175; B: 170; C: 160;

3. If you invest 44 tokens, and the other two people invest 55 and 60 tokens respectively, how many tokens will you receive from the public account?"

A: 172; B: 132; C: 162;

I have answered these questions, click here to next step.

您的角色

您是 1号。

角色已知晓，进入下一步

您的角色

您是 2号。

角色已知晓，进入下一步

您的角色

您是 3号。

角色已知晓，进入下一步

Your role:

You are Player 1.

I have understood the role, click here to next page.

Your role:

You are Player 2.

I have understood the role, click here to next page.

Your role:

You are Player 3.

I have understood the role, click here to next page.

## 您的决定

请决定本轮您将从100.00 元现金券 中向公共账户投资多少钱。

你愿意投资多少钱？

元现金券

已做好决定，进入下一步

Please decide how many tokens you will decide to contribute from 100 in to public account.

How many tokens you are willing to invest

Click here to next page.

Page 9 waiting page

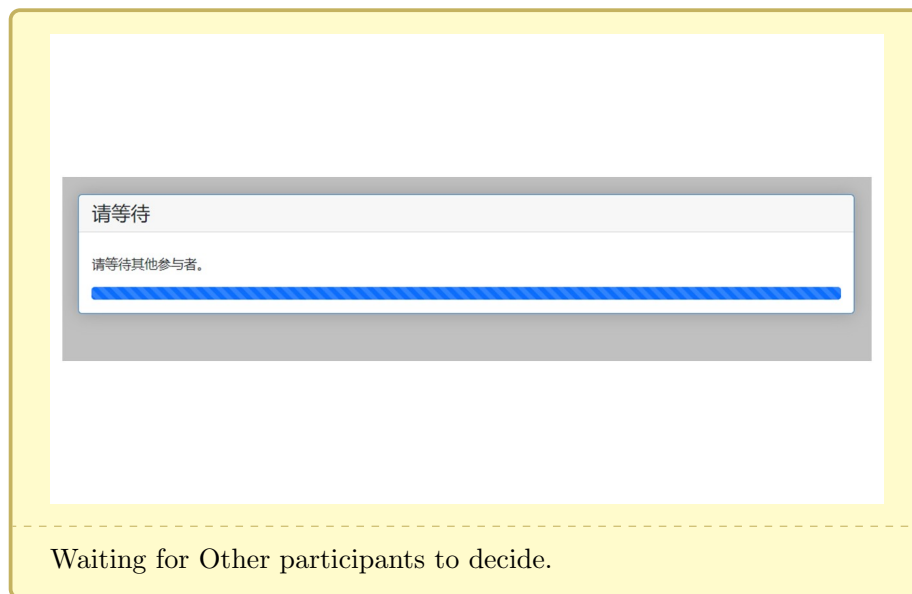

## 投资结果

本轮投资已结束，这些金额已全部存入你们的公共账户。

为开展新项目，现仍需您为所在小组做出第二轮投资。

[阅读完毕，进入下一轮](#)

### Investigation Outcome

This round of investment has ended, and these amounts have been fully deposited into your public account.

For start a new project, now you need to investigate in a second round.

[Click here to next page.](#)

## 您的决定

本轮中您仍将拥有100.00 元现金券代币作为初始资产 请决定本轮您将向公共账户投资多少钱。

你愿意投资多少钱？

元现金券

已做好决定，进入下一步

Please decide how many tokens you will decide to contribute from 100 in to public account.

How many tokens you are willing to invest

Click here to next page.



# 感谢您的参与!

如果针对此研究有任何问题, 欢迎与 [redacted] 取得联系。

Thank you for your attention.
